# Supplementary material for: Clinically Actionable Cancer Somatic Variants (CACSV): A tumor interpreted dataset for analytical workflow
Source: Research Square preprint supplement (doi:10.21203/rs.3.rs-783173/v1), 2021-08-05
Supplement: Supplementary file 1 [file aafc1eae173f6ae0f4cba73e.docx]

| **OncoKB alteration** | **Gene** | **Tumor site** |
| --- | --- | --- |
| Exon 14 splice mutation | MET | Non-Small Cell Lung Cancer (NSCLC) |
| Exon 17 mutations | KIT | Melanoma |
| Exon 19 deletion | EGFR | Non-Small Cell Lung Cancer (NSCLC) |
| Exon 19 insertion | EGFR | Non-Small Cell Lung Cancer (NSCLC) |
| Exon 20 insertion | EGFR | Non-Small Cell Lung Cancer (NSCLC) |
| Oncogenic Mutations | KRAS | Colorectal cancer, All solid tumors |
| Oncogenic Mutations | NRAS | Colorectal cancer, Melanoma |
| Oncogenic Mutations | ALK | NSCLC |
| Oncogenic Mutations | BRCA1 | Breast Cancer (BC) |
| Oncogenic Mutations | BRCA2 | BC |
| Oncogenic Mutations | ERBB2 | BC, NSCLC |
| Oncogenic Mutations | FGFR2 | All solid tumors |
| Oncogenic Mutations | FGFR3 | All solid tumors |
| Oncogenic Mutations | KIT | Melanoma |
| Oncogenic Mutations | PIK3CA | BC |
| Oncogenic Mutations | TSC1 | CNS |
| Oncogenic Mutations | TSC2 | CNS |
| Oncogenic Mutations | ARAF | NSCLC |
| Oncogenic Mutations | ESR1 | BC |
| Oncogenic Mutations | FGFR1 | All solid tumors |
| Oncogenic Mutations | MAP2K1 | Melanoma, NSCLC |
| Oncogenic Mutations | MTOR | All solid tumors |
| Oncogenic Mutations | ATM | All solid tumors |
| Oncogenic Mutations | CDKN2A | All solid tumors |
| Oncogenic Mutations | NF1 | All solid tumors |
| Oncogenic Mutations | PTEN | All solid tumors |
| Oncogenic Mutations | SMARCB1 | All solid tumors |

Table 1: List of single nucleotide variants with specific consequence on OncoKB in the selected tumors.
